1 **Title: Proving Osteoinductive Potential of a Decellularized Xenograft Bone**

2 **Substitute**

3 Running Title: Osteoinductivity in a Porcine Xenograft

4

5 **BASIC RESEARCH ARTICLES**

6

7 **Abstract**

8 Background: Large bone defects remain a major clinical challenge for orthopaedic

9 surgeons. Tissue engineered bone grafts have garnered increased attention as a solution to

10 this problem. One ideal property of any bone graft is osteoinductivity or the ability to

11 stimulate progenitor cell differentiation into a bone forming lineage.

12 Questions:

13 a. Is the osteoinductive potential of a porcine bone xenograft maintained *in*

14 *vitro* after undergoing a novel decellularization and oxidation process?

15 b. Are porcine bone scaffolds osteoinductive in an *in vivo* animal model?

16 Methods:

17 a. *In Vitro* – C2C12 pre-osteoblasts were seeded on the scaffold or a  
18 commercial grade demineralized bone matrix (DBM) to study osteogenic  
19 differentiation and compare osteoinductive potential. MC3T3-E1 pre-  
20 osteoblasts were seeded on the scaffold and compared to a control  
21 monolayer to identify early markers of osteogenic differentiation.

22 b. *In Vivo* – MC3T3-E1-seeded scaffolds were implanted subcutaneously in  
23 mice and assessed for markers of early osteogenic differentiation, new  
24 bone formation (micro-computed tomography and histological  
25 assessment), and vascular infiltration (histology).

26 Results:

27 Osteoinductive potential was demonstrated in *in vitro* experiments by similar osteogenic

28 marker expression compared to DBM and significantly greater expression than a control

29 monolayer.

30 Osteoinductivity was confirmed with *in vivo* experiments showing both new bone  
31 formation and vascular infiltration.

32 Conclusion:

33 Porcine bone maintains osteoinductive properties after decellularization and oxidation.

34 Clinical Relevance:

35 This construct could potentially serve as a bone graft substitute maintaining the  
36 osteoinductive potential of native bone. The unrestricted supply and controlled donor  
37 biology may satisfy a large clinical need for orthopaedic cases requiring bone grafting.

## 38 **Introduction**

39 Management of large bone defects resulting from trauma, infection, or tumor  
40 resection remains a major clinical challenge for orthopaedic surgeons<sup>1-3</sup>. These defects  
41 are considered critical bone defects if they are unlikely to heal spontaneously during a  
42 patient's lifetime and are typically larger than twice the width of the diaphysis<sup>4</sup>. The gold  
43 standard for treatment is the use of autologous bone graft; however, due to the associated  
44 morbidity and lack of adequate bone stock or donor sites, alternative grafts are commonly  
45 used. The ideal bone graft is osteoconductive, osteogenic, and osteoinductive<sup>1</sup>.  
46 Osteoconductivity is the ability for the bone graft to allow osseous growth on the surface,  
47 or within its pores<sup>5</sup>. Osteogenic grafts retain living bone cells<sup>5</sup>. Osteoinductivity is the  
48 ability to stimulate progenitor cells to differentiate into a bone forming cell lineage<sup>5,6</sup>.

49 Alternative bone grafts include allografts and tissue engineered bone substitutes<sup>1,4</sup>.  
50 Allograft use risks disease transmission and has limited availability from young, healthy  
51 donors<sup>7,8</sup>. Tissue engineered constructs include synthetics and xenograft-derived  
52 alternatives<sup>4</sup>. The advantage of synthetic bone replacements is that the constructs can be  
53 manufactured to custom structure<sup>9</sup>. Furthermore, osteogenicity can be artificially re-  
54 created by pre-seeding osteogenic cells onto the material prior to implantation.  
55 Osteoinductivity, however, requires the construct be able to induce cell differentiation,  
56 and therefore is more difficult to re-create<sup>6,10,11</sup>. Xenografts are one potential way to  
57 utilize the natural osteoinductive properties of native bone without using an allograft.  
58 Swine may be the ideal species for xenotransplantation due to physiologic compatibility  
59 with humans<sup>12,13</sup>. However; porcine xenotransplantation is potentially dangerous due to  
60 the presence of the alpha-gal epitope which can induce a severe inflammatory response in

61 human hosts<sup>14,15</sup>. Our laboratory developed a novel decellularization process that  
62 successfully renders porcine soft tissues sterile and removes the alpha-gal epitope<sup>16-19</sup>.  
63 We have applied this process to porcine cancellous bone and demonstrated that the  
64 construct was successfully decellularized and maintained native structural properties,  
65 therefore preserving the construct's osteoconductivity<sup>19,20</sup>. Proteomics data also showed  
66 that important growth factors believed to have a critical role in cell differentiation and  
67 osteoinductivity were also preserved on the scaffold. However, the clinical relevance and  
68 biologic function of these proteins after chemical processing are unknown.

69 Therefore, the current research project aimed to:

- 70 1) Demonstrate osteoinductive potential of a porcine xenograft-derived bone  
71 scaffold *in vitro*.
- 72 2) Prove the osteoinductive potential is maintained in an *in vivo* model.

### 73 **Materials and Methods**

74 *In vitro* and *in vivo* experiments were designed to determine if a novel  
75 decellularization and oxidation protocol applied to porcine bone resulted in an  
76 osteoinductive bone scaffold. Scaffolds were processed using methods previously  
77 described<sup>17</sup>. Briefly, cancellous bone was harvested from the distal metaphysis of  
78 porcine femurs collected from an abattoir and subjected to a chemical decellularization  
79 and oxidation protocol using combinations of deionized water, trypsin, antimicrobials,  
80 peracetic acid, and triton X-100. Residual peracetic acid was cleared from specimens by  
81 serial water washes until PAA levels were below the limits of detection (0.5 parts per  
82 million) with high sensitivity PAA test strips (Quantofix® peroxides test sticks, Sigma).

83 Scaffolds were lyophilized and frozen at -80°C until further use. Previous proteomics  
84 experiments by our group have demonstrated that following this process the protein  
85 composition of the scaffold is similar to that of a commercial DBM product<sup>19</sup> Mass  
86 spectrometry demonstrated that in addition to the expected abundance of structural  
87 proteins, such as collagen alpha-1 and -2 chains, there were also notable similarities in  
88 the growth factors preserved on the scaffold and commercial DBM samples analyzed.  
89 Proteins such as chondroadherin, lumican, fibromodulin and biglycan play critical roles  
90 in cell differentiation, intra-cellular cascade signaling, and extra-cellular matrix assembly,  
91 and were found on both the porcine scaffold and human DBM.

92 Two different cell lines were chosen for indirect quantification of the scaffold's  
93 osteoinductive potential. C2C12 (ATCC<sup>®</sup> CRL1772<sup>™</sup>, Rockville, MD) is a mouse  
94 myoblast cell line that differentiates into osteoblasts in the presence of bone  
95 morphogenetic protein (BMP)-2 and is commonly used in osteoinduction studies<sup>21-25</sup>.  
96 MC3T3-E1 subclone 4 cells (ATCC<sup>®</sup> CRL2593<sup>™</sup>) were chosen as a second cell line for  
97 testing of the scaffold's osteoinductive potential. These cells are an osteoblast precursor  
98 derived from C57BL/6 mice and previously used to study osteoinductive potential<sup>26,27</sup>.

### 99 *In Vitro*

100 Scaffolds or cancellous DBM sheets (Musculoskeletal Transplant Foundation,  
101 Edison NJ) (n=77 per group) were seeded with 1x10<sup>6</sup> C2C12 cells. As a negative control,  
102 cells were also seeded onto gelfoam sponges (Cardinal Health) which have very limited  
103 biologic activity. The C2C12 cell line was passaged in DMEM supplemented with  
104 penicillin/streptomycin and 10% FBS, never exceeding 80% confluence in order to avoid  
105 terminal differentiation and myoblastic depletion. Cells were harvested at passage 4 and

106 suspended in 100  $\mu$ L aliquots before being seeded onto constructs. Constructs were moved  
107 into Petri dishes covered with media and incubated for 24 hours to allow cell attachment  
108 to the matrix.. After 24 hours of incubation Samples from each group (n=11) were taken  
109 for analysis while the remaining were separated for continued incubation in 2 different  
110 medias: 1) Osteogenic Media (OM)<sup>28-31</sup> consisting of DMEM with 10 mM  $\beta$ -  
111 Glycerophosphate and 50  $\mu$ g/mL ascorbic acid and 2) BMP-2 Enriched Media<sup>21,22,25,32</sup>  
112 consisting of the OM supplemented with 100 ng/mL BMP-2 (recombinant human BMP-2  
113 355-BM-050, R&D Systems). OM provided an environment supportive of osteogenic  
114 differentiation due to the addition of  $\beta$ -Glycerophosphate and ascorbic acid, while BMP-2  
115 enriched media served as a positive control to drive cells towards the osteoblastic lineage<sup>33</sup>.  
116 Constructs (n=11) were harvested from each group at days 1, 3, 7, and 15 for analysis of  
117 cell proliferation of early and late osteogenic differentiation<sup>34</sup>. These time points were  
118 chosen after review of previous literature studying osteogenic differentiation with the  
119 C2C12 cell line<sup>25,29,35,36</sup> and specific *in vitro* data showing C2C12 osteogenic  
120 differentiation can occur within 48hours in the presence of BMP-2<sup>22,37</sup>.

121 At each time point, constructs (n=2) from each group (n=6) were rinsed with PBS,  
122 transferred to chamber slides, and incubated with the Live/Dead<sup>®</sup> Viability/Cytotoxicity  
123 Kit (Molecular Probes, Eugene, OR) according to manufacturer's instructions. Specimens  
124 were imaged on a fluorescent confocal microscope (Zeiss Axiovert 100 M) to render cross-  
125 sectional 2D images and projected 3D images. Live cells are labeled with the green calcein  
126 AM fluorophore and dead cells are labeled with the red ethidium homodimer-1  
127 fluorophore.

128 DNA was quantified from constructs (n=3) in each group to estimate cell number  
129 and proliferation. Samples were flash frozen in liquid nitrogen, homogenized with a  
130 sterilized tissue press, and lysed in 1 mL mammalian protein extraction reagent (M-PER<sup>®</sup>,  
131 ThermoScientific, Waltham, MA). Samples were centrifuged and supernatants collected  
132 for analysis using the Quant-iT<sup>™</sup> PicoGreen<sup>®</sup> dsDNA Assay Kit (ThermoScientific).

133 Cell attachment, morphology, and surface distribution were characterized by  
134 electron microscopy. Specimens were removed from dishes in each group at every time  
135 point, washed with PBS, fixed in 2.5% glutaraldehyde for 3 hours, and imaged on a Hitachi  
136 S-2600 scanning electron microscope (SEM).

137 For histology, specimens from each group were removed from dishes, fixed in 10%  
138 formalin for 48 hours, decalcified with Immunocal<sup>®</sup> (Decal Chemical Cort, Tallman, NY)  
139 for 3-5 days, processed, and embedded in paraffin. Sections were mounted and stained with  
140 hematoxylin and eosin (H&E), Masson's trichrome, or 4',6-diamidino-2-phenylindole  
141 (DAPI) mounting media (ProLong<sup>®</sup> Gold Antifade Mountant, ThermoScientific).

142 The alkaline phosphatase (ALP) enzyme activity was measured from constructs  
143 (n=3) using methods previously described.<sup>36,38-42</sup> Each reaction was read in triplicate by  
144 loading 150  $\mu$ L from each tube into 96 well plates and measuring absorbance at 405 nm on  
145 a microplate reader (Spectra Max 340 PC). Cell-specific ALP activity was determined by  
146 normalizing enzyme activity to the respective sample's DNA content determined by Pico  
147 Green assay.<sup>38,43,44</sup>

148 Immunohistochemistry (IHC) was performed with an anti-Placental ALP (Abcam  
149 ab16695, Cambridge, United Kingdom) primary antibody that reacts with cell membrane-  
150 bound enzyme followed by a secondary biotin-conjugated anti-rabbit antibody (BioGenex,

151 Freemont, CA) linked to horseradish peroxidase. Slides were developed with  
152 diaminobenzidine substrate (Vector, Burlingame, CA) and counterstained with Meyer's  
153 Hematoxylin.

154 Next,  $1 \times 10^6$  MC3T3-E1 cells suspended in 50  $\mu$ L of alpha-minimum essential  
155 medium ( $\alpha$ -MEM)+10% FBS were seeded and incubated on the scaffold for 1 hour in 50  
156  $\mu$ L of  $\alpha$ -MEM+10% FBS, before being submerged in 750  $\mu$ L of  $\alpha$ -MEM+10% FBS with  
157 50  $\mu$ M ascorbic acid and incubated at 37°C for 7 days (n=18). Control monolayers of  $1$   
158  $\times 10^4$  cells were also incubated at 37°C for 7 days in 250  $\mu$ L  $\alpha$ -MEM+10% FBS with 50  
159  $\mu$ M ascorbic acid during this time (n=9). The presence of ascorbic acid provides a  
160 supportive environment for MC3T3-E1 cell differentiation.<sup>45,46</sup> After 7 days, RNA was  
161 isolated from the scaffolds by vigorous agitation in Buffer RLT (RNeasy Mini Kit,  
162 QIAGEN, Hilden, Germany) for 30 minutes, and RNA purified following manufacturer  
163 instructions. RNA from monolayers was isolated following manufacturer instructions  
164 using the RNeasy Mini Kit. cDNA was produced through reverse transcription using  
165 High Capacity cDNA Reverse Transcription Kit (Applied Biosystems) and analyzed for  
166 gene expression of osteoblast markers using quantitative PCR (ALP and BMP-7). Target  
167 gene expression was normalized to the housekeeping gene 18S ribosomal RNA. Relative  
168 gene expression was quantified using the  $2^{-\Delta\Delta C_t}$  methodology.<sup>47</sup>

### 169 *In vivo*

170 To demonstrate cell viability and osteoinductivity *in vivo*, scaffolds (n=25) seeded  
171 with MC3T3-E1 cells overnight ( $1 \times 10^6$  suspended in 50  $\mu$ L  $\alpha$ -MEM+10% FBS) were  
172 subcutaneously implanted in 7-week-old male C57BL/6 mice (Jackson Labs) for 4 weeks  
173 under a Wake Forest School of Medicine IACUC Protocol #A16-197. Scaffolds without



174 cells were implanted to serve as a negative control (n=15). A subset of scaffolds (n=12  
175 with cells, n=7 without cells) underwent microcomputed-tomography (microCT)  
176 scanning (TriFoil Imaging Triumph PET/CT, voxel size 1 mm) before cell seeding and  
177 implantation. Upon explantation, constructs were placed in Buffer RLT (QIAGEN) and  
178 vortexed to extract RNA or placed in 10% formalin for repeat microCT scanning to  
179 assess new bone formation. RNA was extracted from explanted scaffolds and analyzed  
180 for gene markers of osteogenic differentiation (ALP, receptor activator of nuclear factor  $\kappa$   
181 B ligand (RANKL), BMP-2, and BMP-7) using quantitative PCR (n=13 with cells, n=8  
182 without cells). Target gene expression was normalized to the housekeeping gene 18S.  
183 Relative gene expression was quantified using the  $2^{-\Delta\Delta C_t}$  methodology. Bone formation in  
184 the scaffolds by serial microCT scanning was assessed by change in bone volume/total  
185 volume ratio (BV/TV) and trabecular thickness (Tb.Th) using MicroView 3D Image  
186 Viewer and Analysis Tool (Parallax Innovations, Ilderton, ON, Canada). After microCT  
187 scanning, samples were fixed in 10% formalin overnight and subsequently decalcified in  
188 14% neutral, saturated EDTA for 7-14 days. Samples were processed and embedded in  
189 paraffin. Sections were stained with Russel-Movat Pentachrome (American MasterTech  
190 Scientific Inc; St. Lodi, CA) and IHC was performed using primary antibodies against  
191 osteopontin (Abcam ab8448) and ALP (R&D Systems FAB1448A) to identify active  
192 bone remodeling, angiogenesis, and new bone formation.

193 Multiple group comparisons were performed using one-way ANOVA, t-tests were  
194 performed on independent means when comparing two groups, and paired t-tests were  
195 used when comparing paired groups. Statistical significance was determined when  $\alpha$  error  
196 < 0.05.

## 197 **Results**

198 C2C12 pre-osteoblasts proliferated on scaffolds and deposited extracellular matrix  
199 (ECM) components. 3D images demonstrated circumferential cell attachment evenly  
200 around the pores. Live (green) signal increased during incubation with the strongest signal  
201 noted at day 15 (Figure 1). Dead (red) signal was strongest on day 1, likely due to early  
202 contact inhibition after seeding constructs at a high cell density. DNA content on DBM  
203 was greater than scaffolds at every time point, indicating higher cell density. BMP had no  
204 consistent effect on cell proliferation. Cells seeded on the scaffold proliferated as  
205 demonstrated by increased DNA at each time point. The differences were significant  
206 between day 1 and 15 ( $p<0.01$ ) and day 3 and 15 ( $p=0.01$ ). Similarly, DNA content on  
207 DBM increased at each time point as well (Figure 2). DAPI and H&E sections (Figure 3)  
208 confirmed higher cell density on DBM relative to scaffolds. SEM supported this finding  
209 with denser cell distribution on DBM samples relative to scaffolds at day 7 and 15 (Figure  
210 4). ECM was deposited uniformly at later time points, and BMP-2 did not change cell  
211 morphology, density, or distribution on matrices. Molecular assays showed that cells  
212 seeded on scaffolds had greater ALP enzyme activity at days 7 and 15 ( $p<0.0001$ )  
213 compared to cells seeded on DBM or gelfoam constructs (Figure 5). BMP-2 increased ALP  
214 activity on all constructs; this increase was significant only for scaffolds (days 3 ( $p=0.005$ ),  
215 7 ( $p=0.02$ ), 15 ( $p<0.0001$ )) suggestive of an additive effect on this matrix. ALP IHC  
216 staining increased at day 15 and supported the above cell-specific enzyme activity findings  
217 (Figure 6). MC3T3-E1 cells pre-seeded on scaffolds demonstrated greater ALP expression  
218 than cell monolayers ( $p=0.0021$ ); however, BMP-7 expression was similar (data not

219 shown). These results indicate the scaffold construct may possess osteoinductive potential  
220 *in vitro*.

221 *In vivo* expression of ALP, BMP-7, and BMP-2 increased within the pre-seeded  
222 scaffolds; however, only ALP was significant (p=0.0009) (Figure 7). RANKL gene  
223 expression was equal between groups. MicroCT analysis was performed on 9 seeded and  
224 4 un-seeded scaffolds. These data demonstrated greater changes in BV/TV and Tb.Th in  
225 the pre-seeded scaffolds; however, only Tb.Th reached significance (p=0.03). Paired t-  
226 tests showed significantly increased BV/TV (p=0.0013) and Tb.Th (p=0.0002) after  
227 explantation in both groups (n=13) indicating new bone formation, regardless of cell  
228 seeding (Figure 8). Pentachrome staining demonstrated angiogenesis and new bone  
229 formation within the scaffold (Figure 9). IHC analysis revealed positive staining for OPN  
230 and ALP. These results proved that the scaffold maintains osteoinductive properties  
231 following decellularization, due to its ability to recruit and stimulate cells down a bone  
232 forming lineage *in vivo*.

## 233 **Discussion**

234 Large bone defects resulting from trauma, infection, or tumor resection often require  
235 bone grafting to fill the defect<sup>1,7</sup>. The gold standard for bone grafting is autologous bone  
236 graft; however, limited quantity and structural deficiencies preclude its use in larger  
237 defects. Allograft is a suitable alternative, but this has been associated with the  
238 transmission of infectious diseases<sup>7,8</sup>. Additionally, the quantity of donor bone is limited,  
239 and donor biology cannot be controlled, resulting in considerable variability in graft  
240 quality<sup>8</sup>. Therefore, tissue engineering plays an increased role in developing  
241 alternatives<sup>48,49</sup>. One possibility is the use of xenografts. Our laboratory established a

242 novel decellularization and oxidation technique using peracetic acid that removes 98% of  
243 DNA when applied to porcine bone<sup>20</sup>. Our current study demonstrates that this treatment  
244 protocol preserves at least some of the native porcine bone's osteoinductive potential in  
245 the decellularized scaffold. *In vitro* results were comparable to demineralized bone  
246 matrix, a commercial product currently in clinical use with proven osteoinductive  
247 potential.

248       There are limitations to our study. First, clinical translation of *in vitro* and animal  
249 experiments is limited. However, we believe these experiments were a necessary first  
250 step to determine the properties of this bone scaffold after undergoing the  
251 decellularization and oxidation procedure. Second, our *in vivo* experiments involve an  
252 ectopic subcutaneous implantation model, rather than an orthotopic bone void filling  
253 model. However, the purpose of these experiments was solely to determine the  
254 osteoinductive potential of this scaffold in an *in vivo* environment. Additionally, RNA  
255 collection may have been limited due to the porous nature of the scaffold. However, we  
256 attempted to minimize this by vigorous agitation of the scaffold for 30 minutes. Finally, a  
257 major limitation is the use of murine rather than human cell lines for these experiments,  
258 which limits immediate clinical translation. These cell lines, however, have been  
259 validated for study of biomaterials osteoinductive potential previously<sup>50,51</sup>. The use of  
260 murine cells also permitted the analysis of immune reactivity and scaffold rejection,  
261 which did not occur in our study.

262       BMP-2 is one of the strongest stimulants of osteogenic differentiation in the pre-  
263 osteoblast cell lines used in our experiments<sup>22,23,37,51-53</sup>. Concentrations as low as 100  
264 ng/mL and 50 ng/mL were sufficient to promote osteogenic differentiation with increased

265 ALP activity in MC3T3-E1<sup>53</sup> and C2C12<sup>22</sup>, respectively. However, few reports studied  
266 osteogenic differentiation of cells seeded onto xenograft derived bone  
267 scaffolds<sup>38,40,43,44,54</sup>. Hashimoto et al.<sup>43</sup> demonstrated that porcine hydroxyapatite contains  
268 osteoinductive properties and that these properties are maintained after processing<sup>43</sup>.  
269 Similarly, Smith et al.<sup>55</sup> found that the osteoinductive properties were maintained in  
270 allografts following a decellularization and washing procedure. However, Bormann et  
271 al.<sup>37</sup> used a similar decellularization and oxidation protocol to ours with the addition of  
272 peracetic acid on allograft specimens and found that the osteoinductive potential was not  
273 maintained. In the present study, we applied a novel decellularization and oxidation  
274 technique using peracetic acid that removed 98% of the porcine DNA from the bone  
275 scaffolds<sup>20</sup>. Contrary to the findings by Boorman et al.<sup>37</sup>, our results demonstrate that the  
276 xenograft does indeed maintain osteoinductive potential after processing. C2C12 and  
277 MC3T3-E1 cells attached to the scaffold matrix, proliferated, and underwent osteogenic  
278 differentiation during the incubation period. The discrepancy between these studies  
279 outlines the variability between decellularization techniques as well as allograft  
280 specimens. Bormann et al.<sup>37</sup> reported that the donors for the samples used ranged in age  
281 from 13-67 years old, and gender could be a source of variability between samples. These  
282 discrepancies may affect osteoinductive capacity<sup>56</sup> and outline the importance of  
283 controlling environmental factors that may influence the quality of the donor bone, which  
284 is only possible with the use of a xenograft.

285 *In vivo* assessment of the porcine bone scaffold demonstrated spontaneous new bone  
286 formation and angiogenesis. The identification of angiogenesis represents a critical  
287 finding due to the lack of vascularization being one of the major limitations associated

288 with the use of tissue engineered constructs during early bone regeneration<sup>57,58</sup>. The  
289 presence of angiogenesis signifies graft-host integration by the induction of inflammatory  
290 cytokines as part of the normal healing process<sup>59</sup>. It is reasonable to conclude that the  
291 presence of angiogenesis allowed for new bone formation due to the known importance  
292 angiogenesis has in bone repair and regeneration<sup>59</sup>. Accordingly, Hirata et al.<sup>60</sup> found that  
293 a BMP-2 soaked absorbable collagen sponge implanted in humans led to new bone  
294 formation lined by endothelial cells. Furthermore, Bhumiratana et al.<sup>61</sup> implanted a  
295 clinically approved decellularized bovine trabecular bone seeded with adipose-derived  
296 stem cells into Yucatan minipig skull defects and concluded that angiogenesis and new  
297 bone formation occurred in parallel.

298 Overall, our data demonstrate that a novel decellularization and oxidation  
299 technique applied to porcine metaphyseal bone preserves the osteoinductive nature of the  
300 bone. Previous literature identifies that these properties are the most difficult to  
301 artificially create in synthetic scaffolds and to maintain when processing bone scaffolds,  
302 therefore outlining the potential clinical impact of this construct. Future studies involving  
303 this xenograft will focus on placing the construct within a bone defect, identifying  
304 osseointegration, and comparing it to current standard treatments. These experiments will  
305 look at the effect of supplementing the scaffold with human mesenchymal stem cells, as a  
306 step towards clinical translation. Furthermore, an *in vivo* analysis of inflammatory  
307 markers to confirm that the bone scaffold has no increased reactivity when compared to  
308 currently used clinical implants for large bone defects should be performed.

## **Acknowledgments**

We thank the Orthopaedic Research and Education Foundation (OREF) and AO Trauma North America for their contribution to the funding of this project through a Resident Clinician Scientist Research Grant. We would also like to thank the Musculoskeletal Transplant Foundation (MTF) for their donation of human DBM samples at no cost. The animal experiments were supported by a CTSI Ignition Fund under the NIH/NCATS UL1 TR001420 grant. We would like to thank Ms. Eileen Elsner, Ms. Jiaozhong Cia, and Dr. Lihong Shi for their help with tissue processing and animal handling throughout these experiments.

## References

1. Calori GM, Mazza E, Colombo M, Ripamonti C. The use of bone-graft substitutes in large bone defects: any specific needs? *Injury*. Sep 2011;42 Suppl 2:S56-63.
2. Fassbender M, Minkwitz S, Thiele M, Wildemann B. Efficacy of two different demineralised bone matrix grafts to promote bone healing in a critical-size-defect: a radiological, histological and histomorphometric study in rat femurs. *International orthopaedics*. Sep 2014;38(9):1963-1969.
3. Kolambkar YM, Dupont KM, Boerckel JD, et al. An alginate-based hybrid system for growth factor delivery in the functional repair of large bone defects. *Biomaterials*. Jan 2011;32(1):65-74.
4. Roddy E, DeBaun MR, Daoud-Gray A, Yang YP, Gardner MJ. Treatment of critical-sized bone defects: clinical and tissue engineering perspectives. *European journal of orthopaedic surgery & traumatology : orthopedie traumatologie*. Apr 2018;28(3):351-362.
5. Khan SN, Cammisa FP, Jr., Sandhu HS, Diwan AD, Girardi FP, Lane JM. The biology of bone grafting. *The Journal of the American Academy of Orthopaedic Surgeons*. Jan-Feb 2005;13(1):77-86.
6. Albrektsson T, Johansson C. Osteoinduction, osteoconduction and osseointegration. *Eur Spine J*. Oct 2001;10 Suppl 2:S96-101.
7. Campana V, Milano G, Pagano E, et al. Bone substitutes in orthopaedic surgery: from basic science to clinical practice. *J Mater Sci Mater Med*. Oct 2014;25(10):2445-2461.
8. De Long WG, Jr., Einhorn TA, Koval K, et al. Bone grafts and bone graft substitutes in orthopaedic trauma surgery. A critical analysis. *The Journal of bone and joint surgery. American volume*. Mar 2007;89(3):649-658.
9. Zimmermann G, Moghaddam A. Allograft bone matrix versus synthetic bone graft substitutes. *Injury*. Sep 2011;42 Suppl 2:S16-21.
10. Fielding G, Bose S. SiO<sub>2</sub> and ZnO dopants in three-dimensionally printed tricalcium phosphate bone tissue engineering scaffolds enhance osteogenesis and angiogenesis in vivo. *Acta biomaterialia*. Nov 2013;9(11):9137-9148.
11. Hsu EL, Ghodasra JH, Ashtekar A, et al. A comparative evaluation of factors influencing osteoinductivity among scaffolds designed for bone regeneration. *Tissue engineering. Part A*. Aug 2013;19(15-16):1764-1772.
12. Pierson RN, 3rd, Dorling A, Ayares D, et al. Current status of xenotransplantation and prospects for clinical application. *Xenotransplantation*. Sep-Oct 2009;16(5):263-280.
13. Wancket LM. Animal Models for Evaluation of Bone Implants and Devices: Comparative Bone Structure and Common Model Uses. *Vet Pathol*. Sep 2015;52(5):842-850.
14. Cooper DKC, Ekser B, Tector AJ. Immunobiological barriers to xenotransplantation. *International journal of surgery*. Nov 2015;23(Pt B):211-216.
15. Vadori M, Cozzi E. The immunological barriers to xenotransplantation. *Tissue antigens*. Oct 2015;86(4):239-253.
16. Whitlock PW, Seyler TM, Parks GD, et al. A novel process for optimizing musculoskeletal allograft tissue to improve safety, ultrastructural properties, and cell infiltration. *The Journal of bone and joint surgery. American volume*. Aug 15 2012;94(16):1458-1467.



17. Whitlock PW, Smith TL, Poehling GG, Shilt JS, Van Dyke M. A naturally derived, cytocompatible, and architecturally optimized scaffold for tendon and ligament regeneration. *Biomaterials*. Oct 2007;28(29):4321-4329.
18. Seyler TM, Bracey DN, Plate JF, et al. The Development of a Xenograft-Derived Scaffold for Tendon and Ligament Reconstruction Using a Decellularization and Oxidation Protocol. *Arthroscopy : the journal of arthroscopic & related surgery : official publication of the Arthroscopy Association of North America and the International Arthroscopy Association*. Feb 2017;33(2):374-386.
19. Bracey DN, Seyler TM, Jinnah AH, et al. A Decellularized Porcine Xenograft-Derived Bone Scaffold for Clinical Use as a Bone Graft Substitute: A Critical Evaluation of Processing and Structure. *Journal of functional biomaterials*. Jul 12 2018;9(3).
20. Bracey DN. *A Decellularized Porcine Xenograft-Derived Bone Scaffold for Clinical Use as a Bone Graft Substitute: A Critical Evaluation of Processing and Structure*: Orthopaedic Surgery, Wake Forest University Graduate School of Arts & Sciences; 2017.
21. Ansari S, Moshaverinia A, Pi SH, Han A, Abdelhamid AI, Zadeh HH. Functionalization of scaffolds with chimeric anti-BMP-2 monoclonal antibodies for osseous regeneration. *Biomaterials*. Dec 2013;34(38):10191-10198.
22. Han B, Tang B, Nimni ME. Quantitative and sensitive in vitro assay for osteoinductive activity of demineralized bone matrix. *Journal of orthopaedic research : official publication of the Orthopaedic Research Society*. Jul 2003;21(4):648-654.
23. Katagiri T, Yamaguchi A, Komaki M, et al. Bone morphogenetic protein-2 converts the differentiation pathway of C2C12 myoblasts into the osteoblast lineage. *J Cell Biol*. Dec 1994;127(6 Pt 1):1755-1766.
24. Shi Q, Li Y, Sun J, et al. The osteogenesis of bacterial cellulose scaffold loaded with bone morphogenetic protein-2. *Biomaterials*. Oct 2012;33(28):6644-6649.
25. Yang Q, Jian J, Abramson SB, Huang X. Inhibitory effects of iron on bone morphogenetic protein 2-induced osteoblastogenesis. *J Bone Miner Res*. Jun 2011;26(6):1188-1196.
26. Araujo-Gomes N, Romero-Gavilan F, Garcia-Arnaez I, et al. Osseointegration mechanisms: a proteomic approach. *Journal of biological inorganic chemistry : JBIC : a publication of the Society of Biological Inorganic Chemistry*. Mar 23 2018.
27. Shuang Y, Yizhen L, Zhang Y, Fujioka-Kobayashi M, Sculean A, Miron RJ. In vitro characterization of an osteoinductive biphasic calcium phosphate in combination with recombinant BMP2. *BMC oral health*. Aug 2 2016;17(1):35.
28. Hupkes M, Sotoca AM, Hendriks JM, van Zoelen EJ, Decherig KJ. MicroRNA miR-378 promotes BMP2-induced osteogenic differentiation of mesenchymal progenitor cells. *BMC Mol Biol*. 2014;15(1):1.
29. Shui W, Zhang W, Yin L, et al. Characterization of scaffold carriers for BMP9-transduced osteoblastic progenitor cells in bone regeneration. *J Biomed Mater Res A*. Oct 16 2013.
30. Sondag GR, Salihoglu S, Lababidi SL, et al. Osteoactivin Induces Transdifferentiation of C2C12 Myoblasts into Osteoblasts. *J Cell Physiol*. Nov 22 2013.
31. Yu S, Geng Q, Ma J, et al. Heparin-binding EGF-like growth factor and miR-1192 exert opposite effect on Runx2-induced osteogenic differentiation. *Cell Death Dis*. 2013;4:e868.

32. Feichtinger GA, Morton TJ, Zimmermann A, et al. Enhanced reporter gene assay for the detection of osteogenic differentiation. *Tissue engineering. Part C, Methods*. Apr 2011;17(4):401-410.
33. Langenbach F, Handschel J. Effects of dexamethasone, ascorbic acid and beta-glycerophosphate on the osteogenic differentiation of stem cells in vitro. *Stem cell research & therapy*. 2013;4(5):117.
34. Coelho MJ, Fernandes MH. Human bone cell cultures in biocompatibility testing. Part II: effect of ascorbic acid, beta-glycerophosphate and dexamethasone on osteoblastic differentiation. *Biomaterials*. Jun 2000;21(11):1095-1102.
35. Rivera JC, Strohbach CA, Wenke JC, Rathbone CR. Beyond osteogenesis: an in vitro comparison of the potentials of six bone morphogenetic proteins. *Frontiers in pharmacology*. 2013;4:125.
36. Shi K, Lu J, Zhao Y, et al. MicroRNA-214 suppresses osteogenic differentiation of C2C12 myoblast cells by targeting Osterix. *Bone*. Aug 2013;55(2):487-494.
37. Bormann N, Pruss A, Schmidmaier G, Wildemann B. In vitro testing of the osteoinductive potential of different bony allograft preparations. *Archives of orthopaedic and trauma surgery*. Jan 2010;130(1):143-149.
38. Arca T, Proffitt J, Genever P. Generating 3D tissue constructs with mesenchymal stem cells and a cancellous bone graft for orthopaedic applications. *Biomed Mater*. Apr 2011;6(2):025006.
39. Liu G, Sun J, Li Y, et al. Evaluation of partially demineralized osteoporotic cancellous bone matrix combined with human bone marrow stromal cells for tissue engineering: an in vitro and in vivo study. *Calcified tissue international*. Sep 2008;83(3):176-185.
40. Marcos-Campos I, Marolt D, Petridis P, Bhumiratana S, Schmidt D, Vunjak-Novakovic G. Bone scaffold architecture modulates the development of mineralized bone matrix by human embryonic stem cells. *Biomaterials*. Nov 2012;33(33):8329-8342.
41. Stiehler M, Seib FP, Rauh J, et al. Cancellous bone allograft seeded with human mesenchymal stromal cells: a potential good manufacturing practice-grade tool for the regeneration of bone defects. *Cytotherapy*. Sep 2010;12(5):658-668.
42. Thibault RA, Scott Baggett L, Mikos AG, Kasper FK. Osteogenic differentiation of mesenchymal stem cells on pregenerated extracellular matrix scaffolds in the absence of osteogenic cell culture supplements. *Tissue engineering. Part A*. Feb 2010;16(2):431-440.
43. Hashimoto Y, Funamoto S, Kimura T, Nam K, Fujisato T, Kishida A. The effect of decellularized bone/bone marrow produced by high-hydrostatic pressurization on the osteogenic differentiation of mesenchymal stem cells. *Biomaterials*. Oct 2011;32(29):7060-7067.
44. Kouroupis D, Baboolal TG, Jones E, Giannoudis PV. Native multipotential stromal cell colonization and graft expander potential of a bovine natural bone scaffold. *Journal of orthopaedic research : official publication of the Orthopaedic Research Society*. Jul 19 2013.
45. Torii Y, Hitomi K, Tsukagoshi N. L-ascorbic acid 2-phosphate promotes osteoblastic differentiation of MC3T3-E1 mediated by accumulation of type I collagen. *Journal of nutritional science and vitaminology*. Jun 1994;40(3):229-238.
46. Franceschi RT, Iyer BS, Cui Y. Effects of ascorbic acid on collagen matrix formation and osteoblast differentiation in murine MC3T3-E1 cells. *Journal of bone and mineral*

- research : the official journal of the American Society for Bone and Mineral Research.* Jun 1994;9(6):843-854.
47. Livak KJ, Schmittgen TD. Analysis of relative gene expression data using real-time quantitative PCR and the 2(-Delta Delta C(T)) Method. *Methods (San Diego, Calif.)*. Dec 2001;25(4):402-408.
  48. Frohlich M, Grayson WL, Wan LQ, Marolt D, Drobnic M, Vunjak-Novakovic G. Tissue engineered bone grafts: biological requirements, tissue culture and clinical relevance. *Current stem cell research & therapy*. Dec 2008;3(4):254-264.
  49. Liu Y, Chan JK, Teoh SH. Review of vascularised bone tissue-engineering strategies with a focus on co-culture systems. *Journal of tissue engineering and regenerative medicine*. Feb 2015;9(2):85-105.
  50. Kanayama S, Kaito T, Kitaguchi K, et al. ONO-1301 Enhances in vitro Osteoblast Differentiation and in vivo Bone Formation Induced by Bone Morphogenetic Protein. *Spine*. Oct 9 2017.
  51. Qadir AS, Um S, Lee H, et al. miR-124 negatively regulates osteogenic differentiation and in vivo bone formation of mesenchymal stem cells. *J Cell Biochem*. May 2015;116(5):730-742.
  52. Heo SY, Ko SC, Nam SY, et al. Fish bone peptide promotes osteogenic differentiation of MC3T3-E1 pre-osteoblasts through upregulation of MAPKs and Smad pathways activated BMP-2 receptor. *Cell biochemistry and function*. Apr 2018;36(3):137-146.
  53. Fu C, Yang X, Tan S, Song L. Enhancing Cell Proliferation and Osteogenic Differentiation of MC3T3-E1 Pre-osteoblasts by BMP-2 Delivery in Graphene Oxide-Incorporated PLGA/HA Biodegradable Microcarriers. *Scientific reports*. Oct 2 2017;7(1):12549.
  54. Lu X, Wang J, Li B, Zhang Z, Zhao L. Gene expression profile study on osteoinductive effect of natural hydroxyapatite. *J Biomed Mater Res A*. Sep 25 2013.
  55. Smith CA, Richardson SM, Eagle MJ, Rooney P, Board T, Hoyland JA. The use of a novel bone allograft wash process to generate a biocompatible, mechanically stable and osteoinductive biological scaffold for use in bone tissue engineering. *Journal of tissue engineering and regenerative medicine*. May 2015;9(5):595-604.
  56. Smith CA, Board TN, Rooney P, Eagle MJ, Richardson SM, Hoyland JA. Human decellularized bone scaffolds from aged donors show improved osteoinductive capacity compared to young donor bone. *PloS one*. 2017;12(5):e0177416.
  57. Giannoni P, Scaglione S, Daga A, Ilengo C, Cilli M, Quarto R. Short-time survival and engraftment of bone marrow stromal cells in an ectopic model of bone regeneration. *Tissue engineering. Part A*. Feb 2010;16(2):489-499.
  58. Muschler GF, Nakamoto C, Griffith LG. Engineering principles of clinical cell-based tissue engineering. *The Journal of bone and joint surgery. American volume*. Jul 2004;86-A(7):1541-1558.
  59. Stegen S, van Gestel N, Carmeliet G. Bringing new life to damaged bone: the importance of angiogenesis in bone repair and regeneration. *Bone*. Jan 2015;70:19-27.
  60. Hirata A, Ueno T, Moy PK. Newly Formed Bone Induced by Recombinant Human Bone Morphogenetic Protein-2: A Histological Observation. *Implant dentistry*. Apr 2017;26(2):173-177.
  61. Bhumiratana S, Bernhard JC, Alfi DM, et al. Tissue-engineered autologous grafts for facial bone reconstruction. *Science translational medicine*. Jun 15 2016;8(343):343ra383.

## Legends

### Figure 1. Live/Dead Stained Confocal Microscopy Images

Demineralized Bone Matrix (DBM), scaffold, and gelfoam matrices were seeded with 1 million C2C12 pre-osteoblast cells and incubated to select time points. Cross sectional images were captured at 10x magnification and overlaid to create the shown 3d projections. On day 1, matrices were switched into osteogenic media (OM) enriched with 100 ng/ml BMP-2. Representative micrographs show green fluorophore (calcein AM) staining of live cells and red fluorophore (ethidium) staining of dead cells. Constructs had notable autofluorescence with ethidium staining as shown in the “blank” images. Cell density increased with time on all 3 matrices, consistent with DNA quantification results.

### Figure 2. DNA Content in Seeded Constructs

Constructs were harvested at select time points, and DNA content was measured with the PicoGreen<sup>®</sup> assay.

\*<0.05, \*\*<0.01, \*\*\*<0.001

- (a) scaffold vs DBM; (b) scaffold vs GF; (c) DBM vs GF
- (d) scaffold OM vs BMP; (e) DBM OM vs BMP; (f) GF OM vs BMP;
- (g) DBM day 1 vs 3; (h) scaffold day 1 vs 3; (i) GF day 1 vs 3;
- (j) DBM day 3 vs 7; (k) scaffold day 3 vs 7; (l) GF day 3 vs 7
- (m) DBM day 7 vs 15; (n) scaffold day 7 vs 15; (o) GF day 7 vs 15
- (p) scaffold day 3 vs 15; (q) DBM day 3 vs 15; (r) GF day 3 vs 15

### Figure 3. Cell Density Staining on Different Constructs

DAPI (A and B) and H&E (C and D) stained sections demonstrating higher cell density on DBM (A and C) relative to scaffolds (B and D).

### Figure 4. Scanning Electron Microscopy of Cell Density

Scanning electron microscopy images demonstrating a denser cell distribution on DBM samples when compared with scaffolds at days 7 and 15.

### Figure 5. Alkaline Phosphatase Enzyme Activity

ALP activity is greater within the cell-seeded scaffolds in osteogenic media (A). ALP activity was significantly greater on scaffolds in a BMP-2 enriched media (B), suggesting an additive effect of the matrix.

### Figure 6. Alkaline Phosphatase Immunohistochemistry

ALP immunohistochemical staining increased at day 15 in both constructs, confirming that there is increased alkaline phosphatase activity that is similar between constructs.

### Figure 7. Gene Expression of Osteogenic Factors

Gene expression of ALP (A; Alk Phos), bone morphogenetic protein (BMP) – 2 (B), and BMP-7 (C) is increased in scaffolds pre-seeded with cells when compared to scaffolds with no cells. However, only alkaline phosphatase reached significance.

**Figure 8. MicroCT Analysis of *in vivo* Constructs**

Bone volume ratio and trabecular thickness both increase between pre-implantation and explantation ( $p=0.0013$  and  $p=0.0002$ , respectively) signifying new bone formation within the xenograft.

**Figure 9. Histological Staining of *in vivo* Constructs**

Pentachrome staining demonstrating new vessel formation (black arrow) and new bone formation (blue arrow).



Figure 1

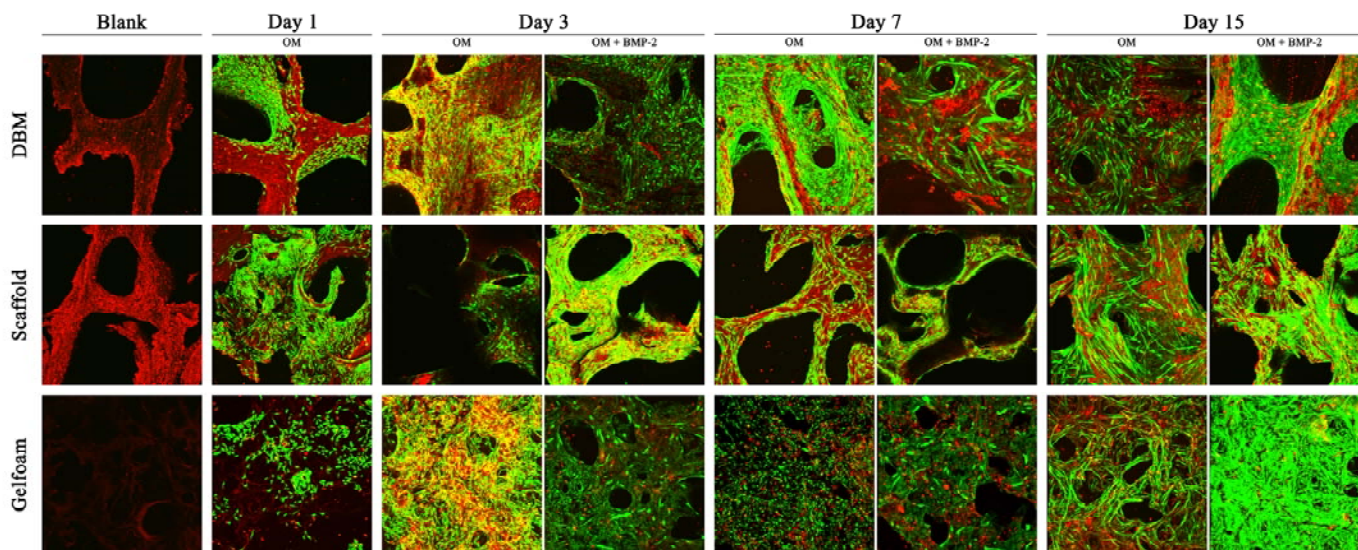

Figure 2

DNA Content

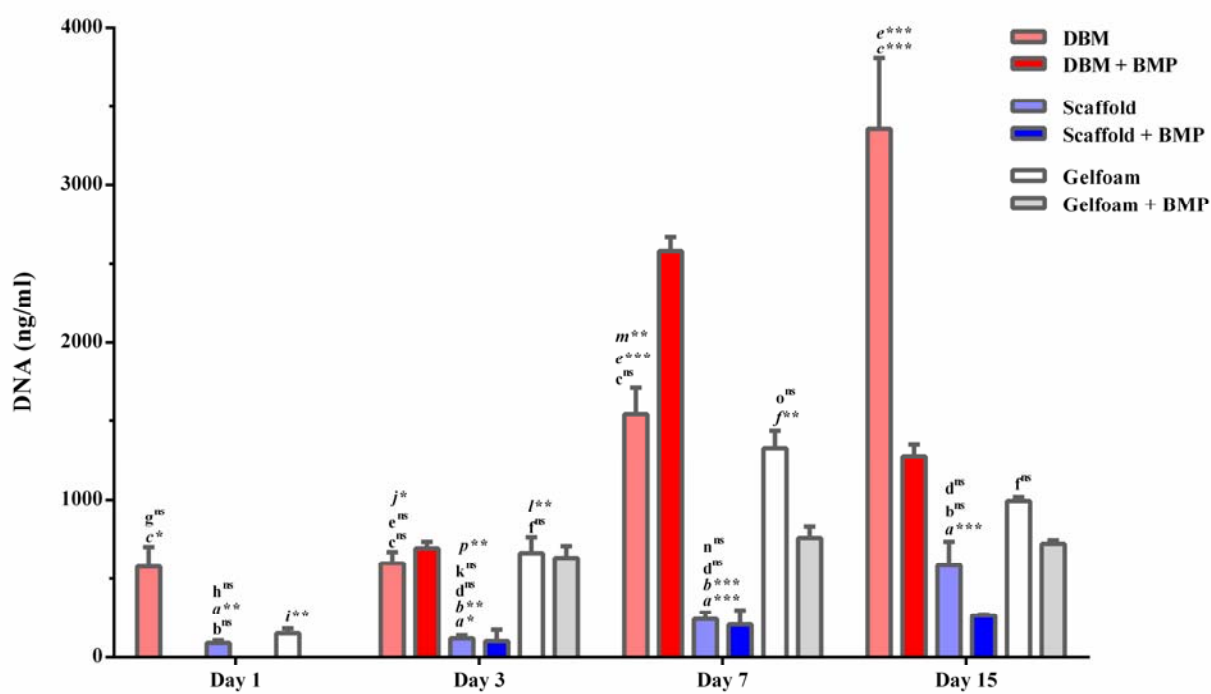

Figure 3

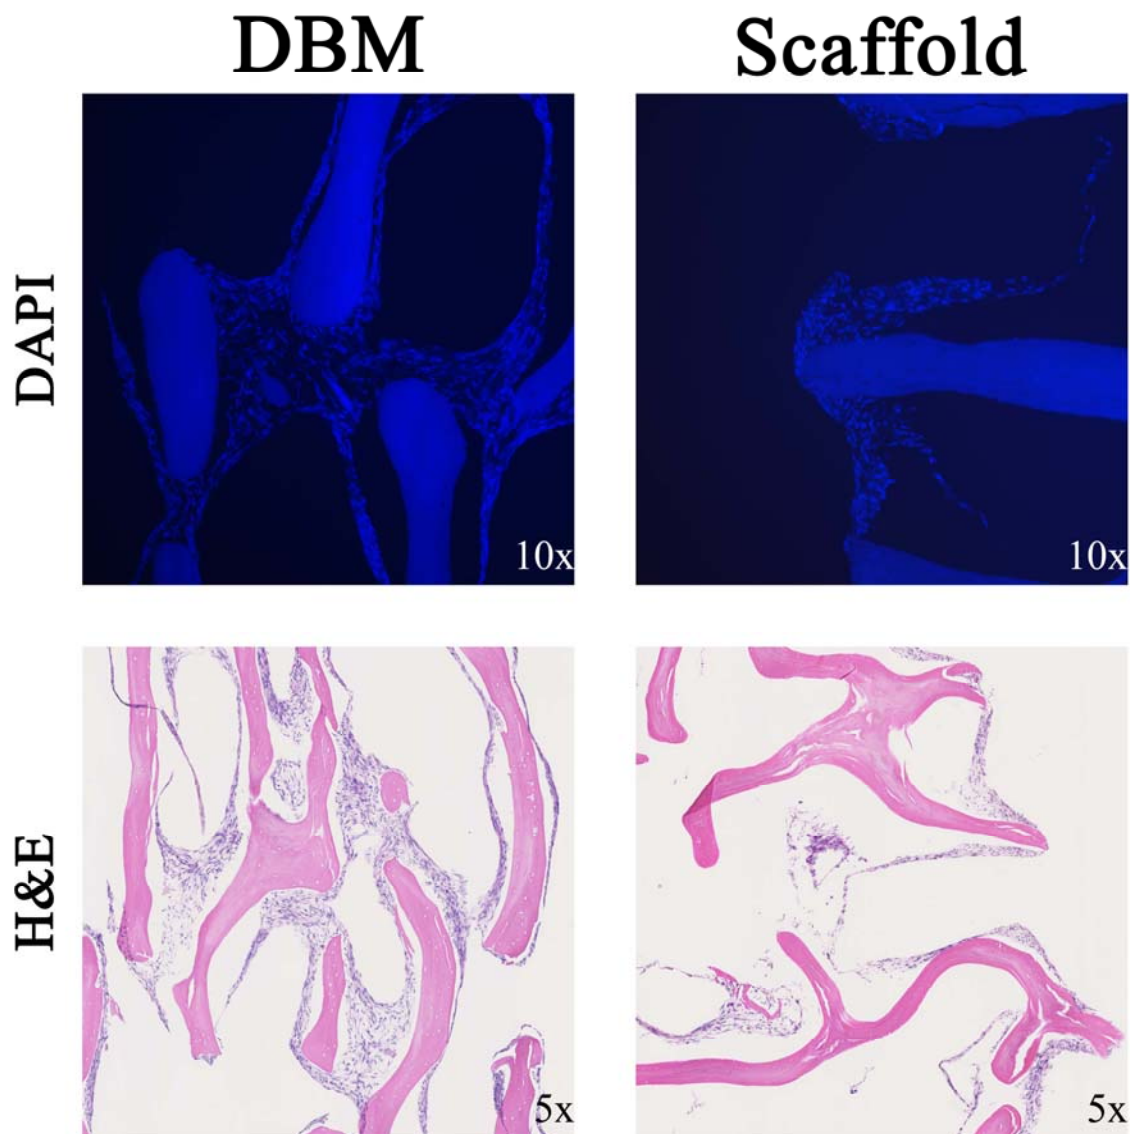



Figure 4

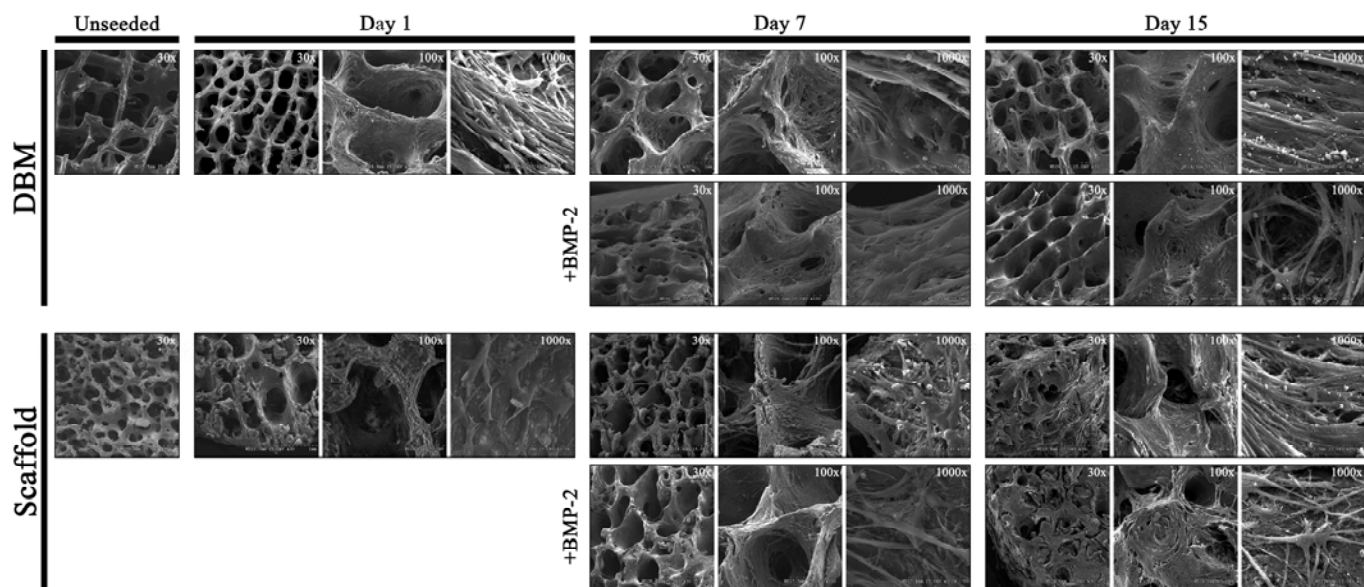

Figure 5

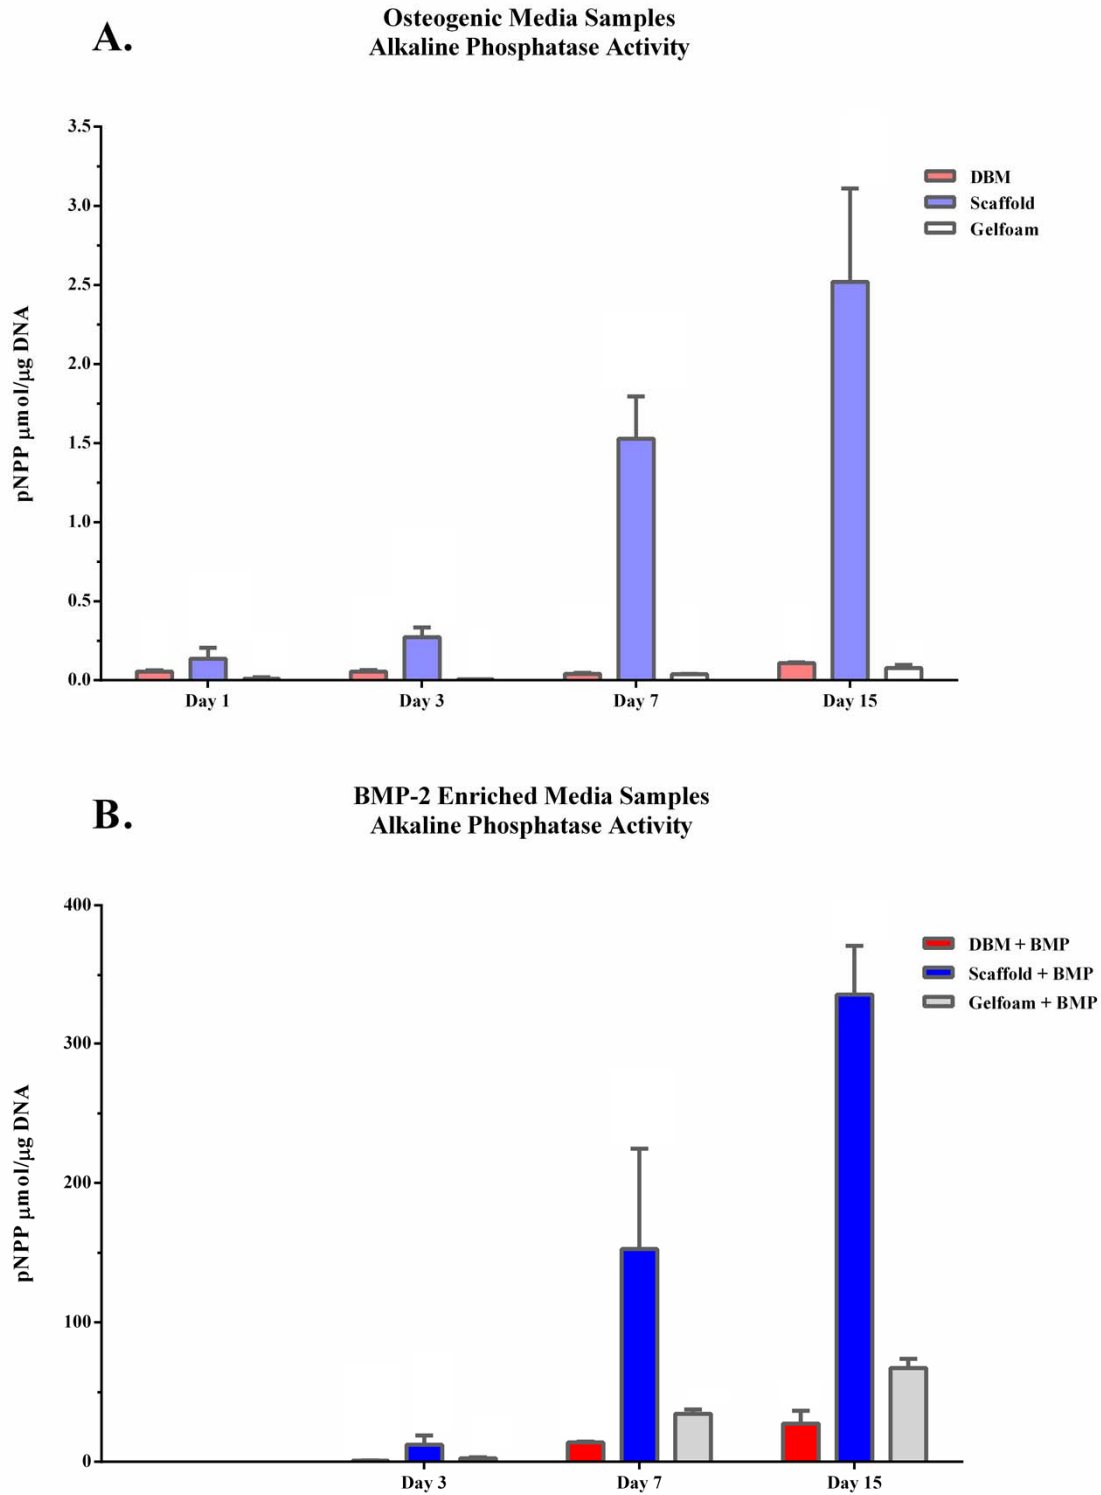

Figure 6

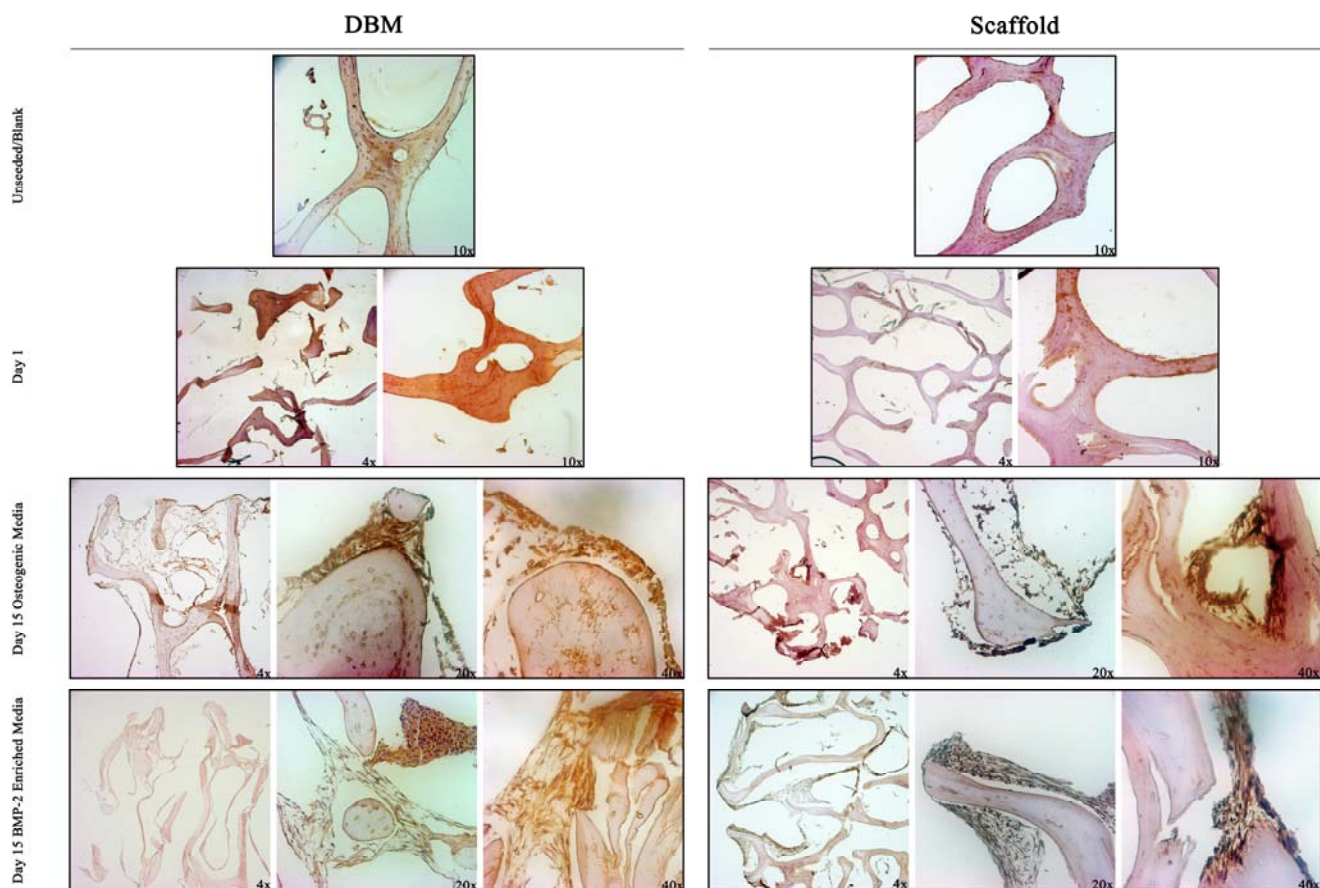

Figure 7

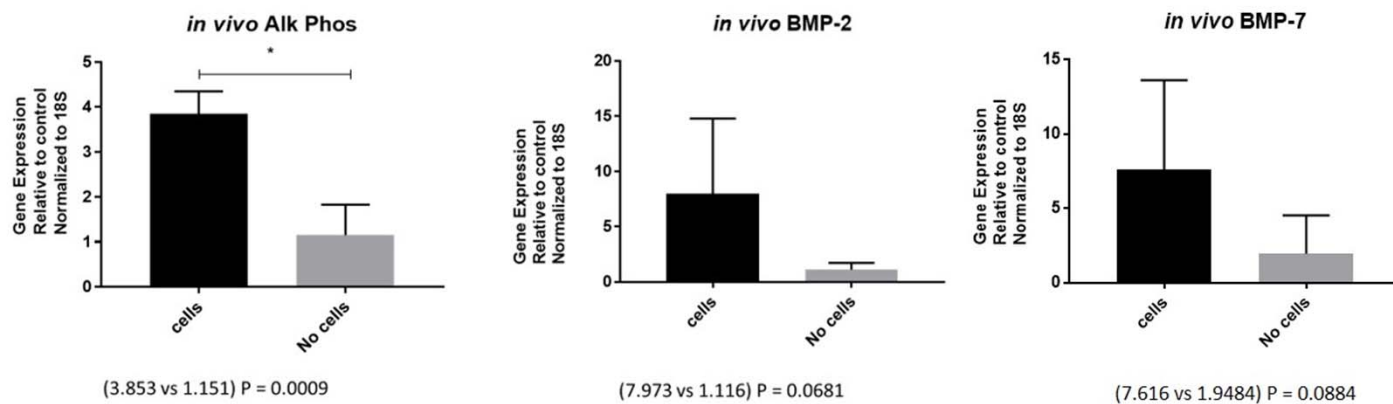

Figure 8

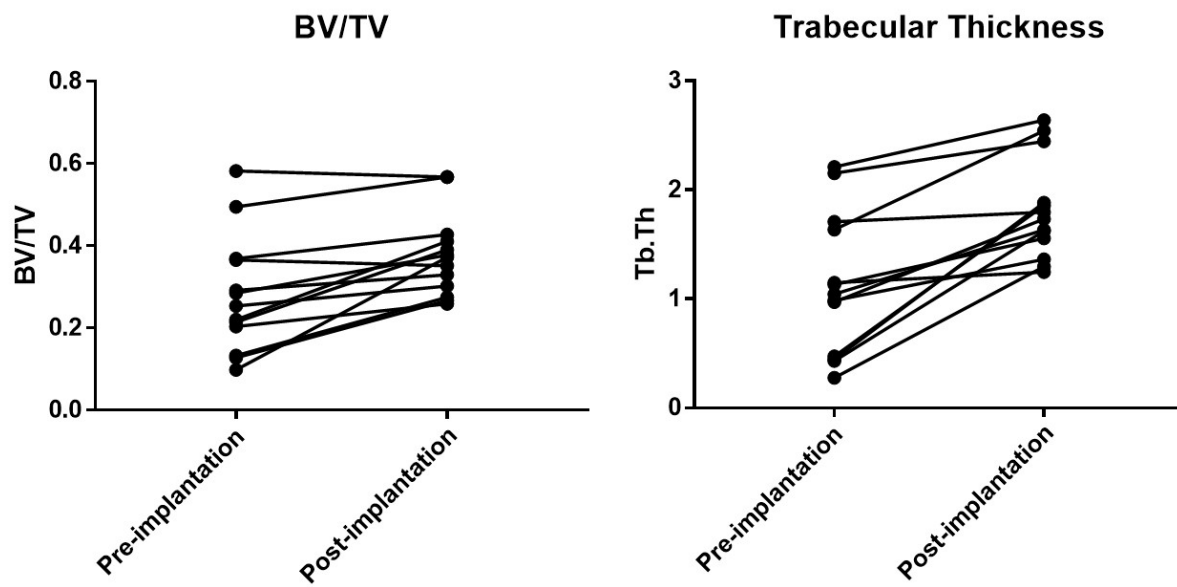



Figure 9

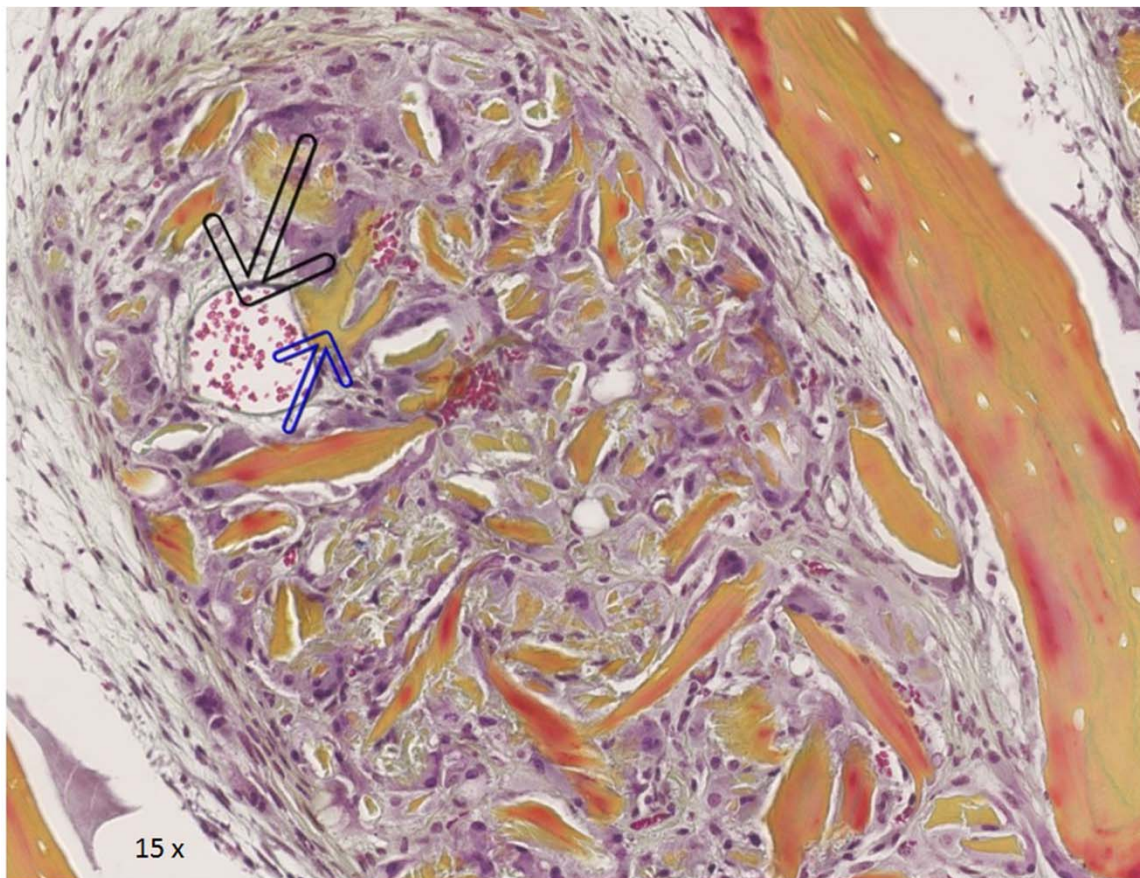

Source: https://www.biorxiv.org/content/10.1101/419101v1.full.pdf
